# Supplementary material
Source: Springer Nature journal article supplement (https://www.springermedizin.de/resource/supplementary/12865_2013_576_MOESM3_ESM.pdf/9428276)

**A****Native****Depig-pol**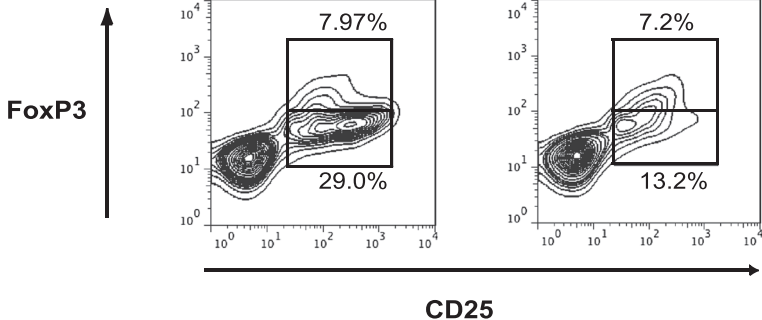**B****HDM****GRASS**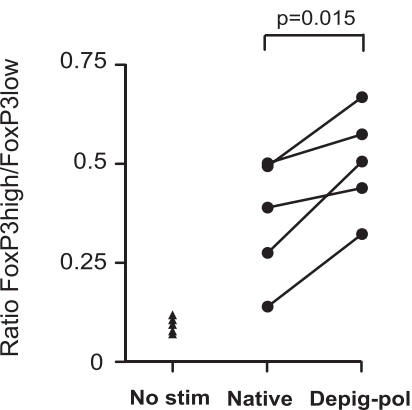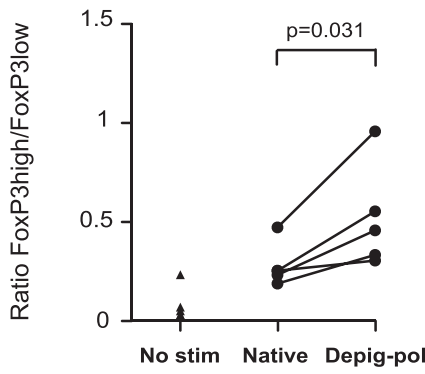

Supplement: MOESM3 [file 9428276]
